# Supplementary material for: The Adult and Larva of a New Species of the Genus Dila (Coleoptera, Blaptinae, Blaptini) from Himalayas, with Molecular Phylogenetic Inferences of Related Genera of the Blaptini
Source: MDPI journal article supplement (doi:10.3390/insects14030284), 2023-03-13
Supplement: s1 [file s1]

**Table S1.** List of specimens used in this study with the corresponding Accession Number

| No | Species                    | Sampling locality                 | Date of collection | Collector(s)         | Preservation | DNA 序列(序列号/* 代表有; - 代表无)            |
|----|----------------------------|-----------------------------------|--------------------|----------------------|--------------|-------------------------------------|
|    |                            |                                   |                    |                      |              | COI / Cytb / 16S / 28S              |
| 1  | <i>Nalepa yushuensis</i>   | Shanglaxiu, Yushu, Qinghai, China | 2012-VII-21        | G. Ren <i>et al.</i> | Dried        | ON827495/ON856244/ON818477/ON818505 |
| 2  | <i>Nalepa yushuensis</i>   | Jyêgu, Yushu, Qinghai, China      | 2019-VII-24        | X. Bai <i>et al.</i> | Ethanol      | ON827500/ON856231/ON818463/ON818490 |
| 3  | <i>Nalepa yushuensis</i>   | Chaiwei, Qamdo, Xizang, China     | 2018-VIII-23       | X. Bai <i>et al.</i> | Ethanol      | ON827506/ON856255/ON818483/ON818512 |
| 4  | <i>Nalepa acuminata</i>    | Jinsha, Baiyü, Sichuan, China     | 2016-VIII-6        | X. Li <i>et al.</i>  | Ethanol      | -----/ON856246/ON818479/ON818508    |
| 5  | <i>Nalepa acuminata</i>    | Hepo, Baiyü, Sichuan, China       | 2016-VIII-6        | X. Li <i>et al.</i>  | Ethanol      | -----/-----/ON856235/ON818496       |
| 6  | <i>Nalepa polita</i>       | Yagra, Garzê, Sichuan, China      | 2016-VIII-5        | X. Li <i>et al.</i>  | Ethanol      | ON827511/-----/ON856236/ ON818498   |
| 7  | <i>Nalepa polita</i>       | Chowa, Dêgê, Sichuan, China       | 2011-VII-26        | G. Ren <i>et al.</i> | Dried        | -----/ON856254/ON818488/ON818517    |
| 8  | <i>Nalepa quadrata</i>     | G350 road, Luhuo, Sichuan, China  | 2021-VII-17        | X. Li <i>et al.</i>  | Ethanol      | ON827505/-----/ON818468/ON818495    |
| 9  | <i>Nalepa quadrata</i>     | Simu, Luhuo, Sichuan, China       | 2016-VIII-3        | X. Li <i>et al.</i>  | Ethanol      | ON827509/ON856252/ON818486/ON818515 |
| 10 | <i>Nalepa quadrata</i>     | Simu, Luhuo, Sichuan, China       | 2016-VIII-3        | X. Li <i>et al.</i>  | Ethanol      | ON827510/ON856253/ON818487/ON818516 |
| 11 | <i>Nalepa quadrata</i>     | Lean, Xinlong, Sichuan, China     | 2016-VIII-14       | X. Li <i>et al.</i>  | Ethanol      | ON827494/ ----- / ----- /ON818504   |
| 12 | <i>Nalepa xinlongensis</i> | Mari, Xinlong, Sichuan, China     | 2016-VIII-14       | X. Li <i>et al.</i>  | Ethanol      | ON827498/ON856249/ON818482/ON818511 |
| 13 | <i>Nalepa ovalifolia</i>   | Gongya, Dêgê, Sichuan, China      | 2016-VIII-6        | X. Li <i>et al.</i>  | Ethanol      | -----/ON856247/ON818480/ON818509    |

| No | Species                   | Sampling locality                    | Date of collection | Collector(s)         | Preservation | DNA 序列(序列号/* 代表有; - 代表无)            |
|----|---------------------------|--------------------------------------|--------------------|----------------------|--------------|-------------------------------------|
|    |                           |                                      |                    |                      |              | COI / Cytb / 16S / 28S              |
| 14 | <i>Nalepa ovalifolia</i>  | Xindu, Luhuo, Sichuan, China         | 2016-VIII-6        | X. Li <i>et al.</i>  | Ethanol      | ON827489/ON856238/ON818471/ON818500 |
| 15 | <i>Nalepa ovalifolia</i>  | Gyamda, Jomda, Xizang, China         | 2016-VIII-8        | X. Li <i>et al.</i>  | Ethanol      | ON827488/ON856237/ON818470/ON818499 |
| 16 | <i>Nalepa cylindracea</i> | Ya' ngan, Baqen, Xizang, China       | 2018-VIII-21       | X. Bai <i>et al.</i> | Ethanol      | ON827502/ON856230/ON818465/ON818492 |
| 17 | <i>Nalepa cylindracea</i> | Ya' ngan, Baqen, Xizang, China       | 2018-VIII-21       | X. Bai <i>et al.</i> | Ethanol      | ON827503/ON856232/ON818466/ON818493 |
| 18 | <i>Nalepa cylindracea</i> | Gyidoi, Riwoqê, Xizang, China        | 2019-VII-27        | X. Bai <i>et al.</i> | Ethanol      | ON827501/-----/ON818464/ON818491    |
| 19 | <i>Nalepa cylindracea</i> | Saiqu, Zadoi, Qinghai, China         | 2012-VII-22        | G. Ren <i>et al.</i> | Dried        | ON827496/ON856245/ON818478/ON818506 |
| 20 | <i>Nalepa cylindracea</i> | Gesang, Zadoi, Qinghai, China        | 2019-VII-25        | X. Bai <i>et al.</i> | Ethanol      | ON827499/ON856151/-----/ON818489    |
| 21 | <i>Nalepa cylindracea</i> | Oyala pass, Nangqên, Qinghai, China  | 2019-VII-27        | X. Bai <i>et al.</i> | Ethanol      | ON827502/ON856230/ON818465/ON818492 |
| 22 | <i>Nalepa cylindracea</i> | Gyanbê, Gonjo, Xizang, China         | 2016-VIII-8        | X. Li <i>et al.</i>  | Ethanol      | ON827492/ON856241/ON818474/-----    |
| 23 | <i>Nalepa cylindracea</i> | Lhatog, Chamdo, Xizang, China        | 2016-VIII-9        | X. Li <i>et al.</i>  | Ethanol      | ON827493/ON856242/ON818475/ON818503 |
| 24 | <i>Nalepa cylindracea</i> | Toba, Chamdo, Xizang, China          | 2016-VIII-9        | X. Li <i>et al.</i>  | Ethanol      | ON827497/ON856248/ON818481/ON818510 |
| 25 | <i>Nalepa cylindracea</i> | Qu' nyido, Jomda, Xizang, China      | 2016-VIII-9        | X. Li <i>et al.</i>  | Ethanol      | ON827491/ON856240/ON818473/ON818502 |
| 26 | <i>Nalepa cylindracea</i> | Qu' nyido, Jomda, Xizang, China      | 2016-VIII-8        | X. Li <i>et al.</i>  | Ethanol      | ON827490/ON856239/ON818468/ON818501 |
| 27 | <i>Nalepa cylindracea</i> | G214 road, Mangkang, Xizang, China   | 2021-VII-13        | X. Li <i>et al.</i>  | Ethanol      | ON827504/ON856233/ON818467/ON818494 |
| 28 | <i>Nalepa cylindracea</i> | Zom La shan, Mangkang, Xizang, China | 2016-VIII-12       | X. Li <i>et al.</i>  | Ethanol      | ON827508/ON856251/ON818485/ON818514 |

| No | Species                      | Sampling locality                 | Date of collection | Collector(s)         | Preservation | DNA 序列(序列号/* 代表有; - 代表无)            |
|----|------------------------------|-----------------------------------|--------------------|----------------------|--------------|-------------------------------------|
|    |                              |                                   |                    |                      |              | COI / Cytb / 16S / 28S              |
| 29 | <i>Ablapsis compressipes</i> | Gamtog, Jomda, Xizang, China      | 7.VIII.2016        | X. Li <i>et al.</i>  | Ethanol      | -----/OQ603110/-----/OQ600261       |
| 30 | <i>Ablapsis compressipes</i> | Jangra, Dêgê, Sichuan, China      | 6.VIII.2016        | X. Li <i>et al.</i>  | Ethanol      | OQ587587/OQ603111/-----/OQ600262    |
| 31 | <i>Blaps brevis</i>          | Bangoin, Xizang, China            | 17.VIII.2018       | X. Bai <i>et al.</i> | Ethanol      | OQ587577/OQ603099/OQ600379/OQ600272 |
| 32 | <i>Blaps brevis</i>          | Baila, Bangoin, Xizang, China     | 3.VIII.2019        | X. Bai <i>et al.</i> | Ethanol      | OQ587578/OQ603100/-----/OQ600273    |
| 33 | <i>Blaps apicecostata</i>    | Rongxar, Tingri, Xizang, China    | 27.VII.2014        | G. Ren <i>et al.</i> | Ethanol      | OQ587584/OQ603104/OQ600385/OQ600281 |
| 34 | <i>Blaps apicecostata</i>    | Xar Qu, Biru, Xizang, China       | 13.VIII.2015       | X. Bai <i>et al.</i> | Ethanol      | OQ587586/OQ603106/OQ600387/OQ600277 |
| 35 | <i>Blaps apicecostata</i>    | Doina, Yatung, Xizang, China      | 19.VIII.2015       | X. Bai <i>et al.</i> | Ethanol      | OQ587576/OQ603101/-----/-----       |
| 36 | <i>Blaps holcus</i>          | Doina, Nedong, Xizang, China      | 8.VIII.2014        | G. Ren <i>et al.</i> | Ethanol      | -----/OQ603105/OQ600386/OQ600282    |
| 37 | <i>Blaps holcus</i>          | Dagzê X50, Sanghu, Xizang, China  | 16.VIII.2018       | X. Bai <i>et al.</i> | Ethanol      | OQ587579/OQ603098/OQ600380/OQ600274 |
| 38 | <i>Blaps rhynchoptera</i>    | Ma'an, Xichang, Sichuan, China    | 2.VIII.2015        | X. Bai <i>et al.</i> | Ethanol      | OQ587585/OQ603107/OQ600388/OQ600280 |
| 39 | <i>Blaps rhynchoptera</i>    | Shuiwan, Mianning, Sichuan, China | 1.VIII.2020        | M. Ma                | Ethanol      | OQ587580/OQ603097/OQ600381/OQ600275 |
| 40 | <i>Blaps rhynchoptera</i>    | Zhao, M <i>et al.</i> (2019)      | n/a                | n/a                  | Ethanol      | MK854717                            |
| 41 | <i>Blaps garzica</i>         | Ronggai, Baiyü, Sichuan, China    | 5.VIII.2016        | X. Li <i>et al.</i>  | Ethanol      | ----- /OQ603109/OQ600389/OQ600284   |
| 42 | <i>Blaps garzica</i>         | Mari, Xinlong, Sichuan, China     | 14.VIII.2016       | X. Li <i>et al.</i>  | Ethanol      | OQ587588/OQ603112/OQ600391/OQ600263 |

| No | Species                                | Sampling locality                       | Date of collection | Collector(s)         | Preservation | DNA 序列(序列号/* 代表有; - 代表无)            |
|----|----------------------------------------|-----------------------------------------|--------------------|----------------------|--------------|-------------------------------------|
|    |                                        |                                         |                    |                      |              | COI / Cytb / 16S / 28S              |
| 43 | <i>Blaps yini</i>                      | Tongmai, Nyingri , Xizang, China        | 17.VIII.2020       | Z. Hu                | Ethanol      | OQ587581/-----/OQ600382/OQ600276    |
| 44 | <i>Blaps yini</i>                      | Egong, Bome , Xizang, China             | 30.VII.2021        | G. Ren <i>et al.</i> | Ethanol      | OQ587582/OQ603102/OQ600383/OQ600278 |
| 45 | <i>Blaps yini</i>                      | Medog, Xizang, China                    | 11. VIII.2016      | Zh.Chen              | Ethanol      | ----- /OQ603108/OQ600390/OQ600283   |
| 46 | <i>Blaps yini</i>                      | Paggai, Bome , Xizang, China            | 1.VIII.2021        | G. Ren <i>et al.</i> | Ethanol      | OQ587583/OQ603103/OQ600384/OQ600279 |
| 47 | <i>Coelocnemodes hurzensis</i>         | Lugu Lake, Yunnan, China                | 3.VI.2012          | H. Huang             | Dried        | OQ587596/OQ603119/OQ600374/-----    |
| 48 | <i>Coelocnemodes tibialis</i>          | Cangshan, Dali , Yunnan, China          | 15.VI.2011         | J. Xu                | Dried        | -----/OQ603122/OQ600377/-----       |
| 49 | <i>Dila bomina</i>                     | Egong, Bome , Xizang, China             | 31.VII.2021        | G. Ren <i>et al.</i> | Ethanol      | OQ587601/OQ603126/OQ600394/-----    |
| 50 | <i>Dila bomina</i>                     | Guxiang, Bome , Xizang, China           | 27.VII.2009        | G. Ren <i>et al.</i> | Dried        | OQ587595/OQ603120/OQ600373/OQ600270 |
| 51 | <i>Dila laevicollis</i>                | Dangara region, Tajikistan              | 21.VII.2013        | J. Yao               | Dried        | -----/OQ603121/OQ600376/-----       |
| 52 | <i>Dila ngaria</i> <b>sp. n.</b>       | Xiangzi Township, Tsada , Xizang, China | 24.VIII.2015       | G. Ren <i>et al.</i> | Ethanol      | OQ587597/-----/OQ600375/OQ600271    |
| 53 | <i>Dila ngaria</i> <b>sp. n.</b> larva | Xiangzi Township, Tsada , Xizang, China | 24.VIII.2015       | G. Ren <i>et al.</i> | Ethanol      | OQ587599/OQ603124/OQ600392/-----    |
| 54 | <i>Dila ngaria</i> <b>sp. n.</b>       | Tuolin Township, Tsada , Xizang, China  | 11.VIII.2018       | X. Li <i>et al.</i>  | Ethanol      | OQ587600/OQ603125/OQ600393/OQ600285 |
| 55 | <i>Prosodes zarudenyi</i>              | Poma, Zhaosu, Xinjiang, China           | 25.VI.2009         | Z. Pan <i>et al.</i> | Dried        | OQ587592/OQ603116/OQ600370/OQ600266 |
| 56 | <i>Prosodes zarudenyi</i>              | Poma, Zhaosu, Xinjiang, China           | 25.VI.2009         | Z. Pan <i>et al.</i> | Dried        | OQ587593/OQ603117/OQ600371/OQ600267 |

| No | Species                     | Sampling locality                        | Date of collection | Collector(s)         | Preservation | DNA 序列(序列号/* 代表有; - 代表无)            |
|----|-----------------------------|------------------------------------------|--------------------|----------------------|--------------|-------------------------------------|
|    |                             |                                          |                    |                      |              | COI / Cytb / 16S / 28S              |
| 57 | <i>Prosodes regeli</i>      | Nilak, Xinjiang, China                   | 1.VI.2006          | Y. Ba <i>et al.</i>  | Dried        | OQ587590/OQ603114/-----/OQ600268    |
| 58 | <i>Prosodes regeli</i>      | Tekes, Xinjiang, China                   | 30.V.2006          | Y. Ba <i>et al.</i>  | Dried        | OQ587594/OQ603118/OQ600372/OQ600269 |
| 59 | <i>Prosodes</i> sp.         | Mori Kazak, Xinjiang, China              | 17.VI.2016         | Y. Ba <i>et al.</i>  | Dried        | OQ587589/OQ603113/OQ600368/OQ600264 |
| 60 | <i>Prosodes pekinensis</i>  | Pailu Mountain, Haiyuan, Xinjiang, China | 18.VII.2009        | X.Wang <i>et al.</i> | Dried        | OQ587591/OQ603115/OQ600369/OQ600265 |
| 61 | <i>Gnaptor spinimanus</i>   | Serbia Vrsac, Vrsacko brdo               | 24.VII.2015        | C. Chen              | Dried        | OQ587598/OQ603123/OQ600378/-----    |
| 62 | <i>Gnaptor spinimanus</i>   | Soldati, L <i>et al.</i> (2017)          | n/a                | n/a                  | Ethanol      | KX398842                            |
| 63 | <i>Oodescelis oblonga</i>   | Kurdnin, Tokkuztara, Xinjiang, China     | 4.VIII.2007        | C. Zhang             | Dried        | MG993076/MG993086/MH410298/MG993063 |
| 64 | <i>Oodescelis affinis</i>   | Daban, Tekes, Xinjiang, China            | 21.V.2009          | D. Sun               | Dried        | MG993073/MG993083/MH410299/MG993060 |
| 65 | <i>Oodescelis emmerichi</i> | Huang shian, Xixia , Henan, China        | 18.VIII.2008       | G. Ren <i>et al.</i> | Dried        | MG993074/MG993084/MH185104/MG993061 |
| 66 | <i>Oodescelis emmerichi</i> | Niubei liang, Zhashui , Shaanxi, China   | 22.VII.2011        | X. Zhu <i>et al.</i> | Dried        | -----/MG993074/MH185103/-----       |
